# Supplementary material
Source: PubMed Central journal article supplement (PMC122650)

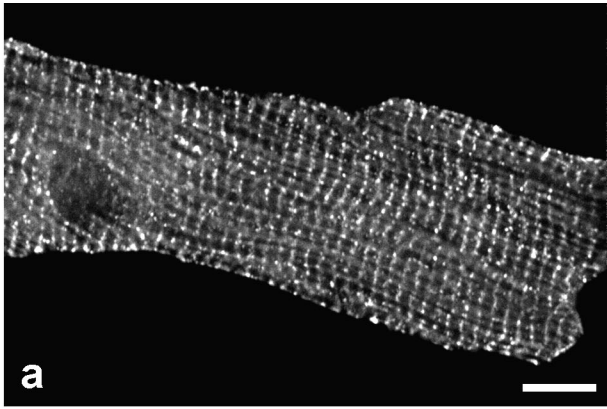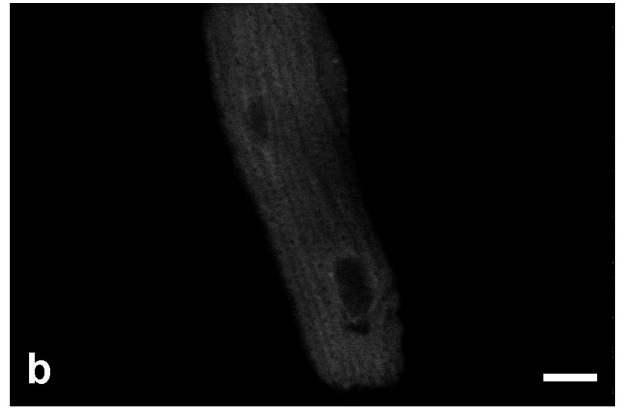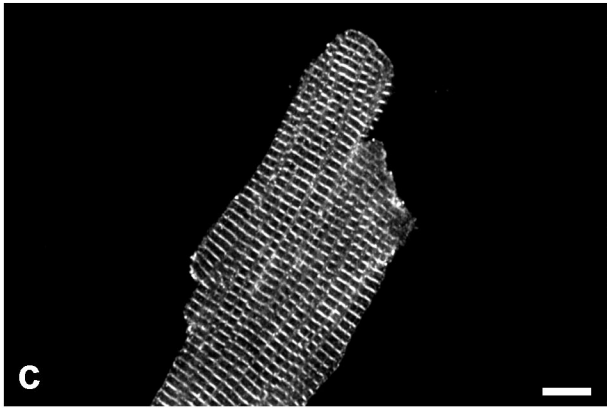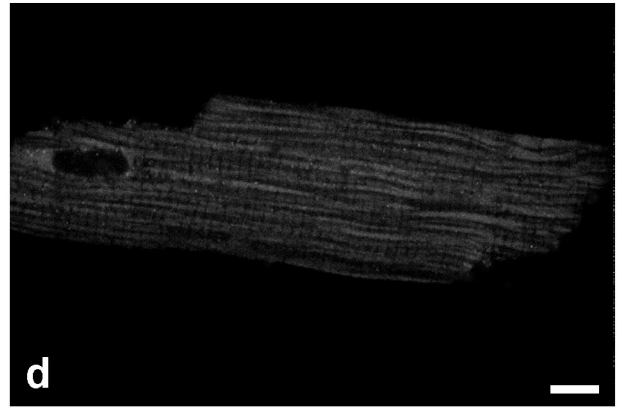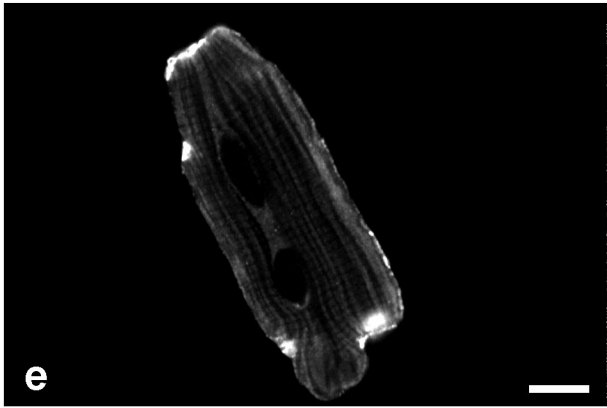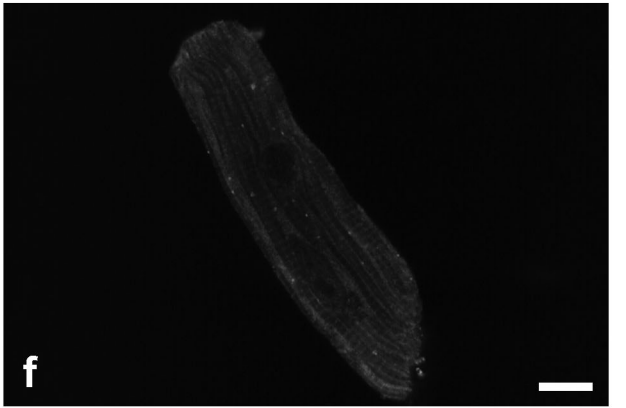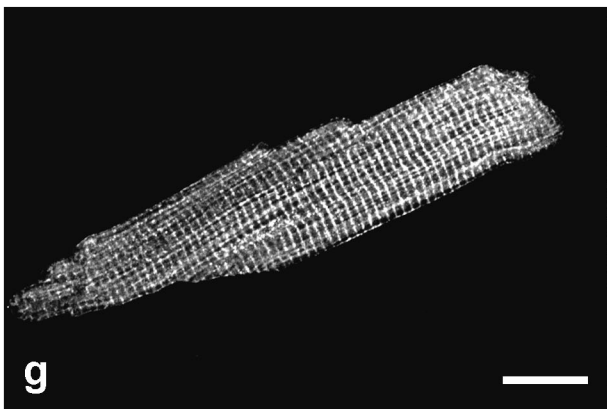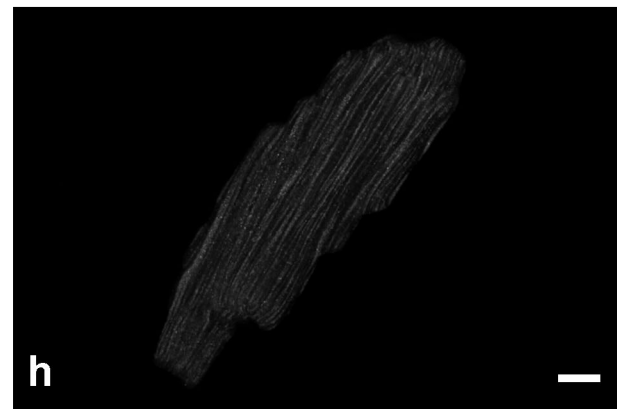

Supplement: pnas_261705699_4.pdf [file pnas_261705699_4.pdf]
